# Supplementary material
Source: Springer Nature journal article supplement (https://www.springermedizin.de/resource/supplementary/12879_2013_3030_MOESM2_ESM.pdf/9446840)

**Interleukin-1 $\beta$  (Symptomatic)**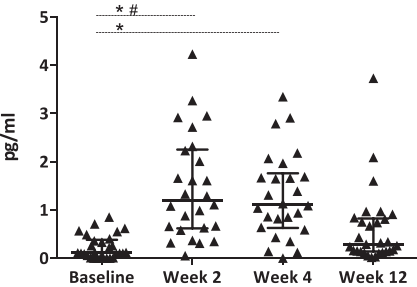**Interleukin-1 $\beta$  (Control)**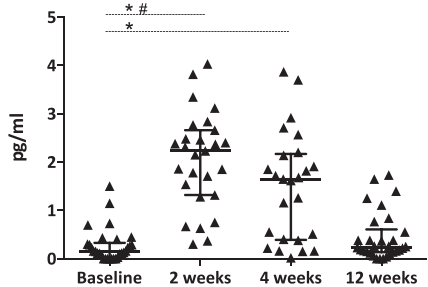**Interleukin-2 (Symptomatic)**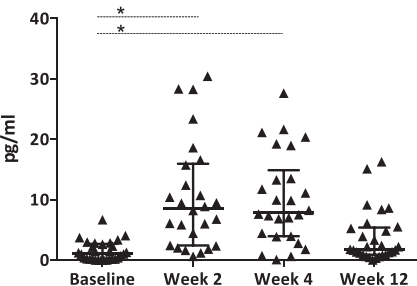**Interleukin-2 (Control)**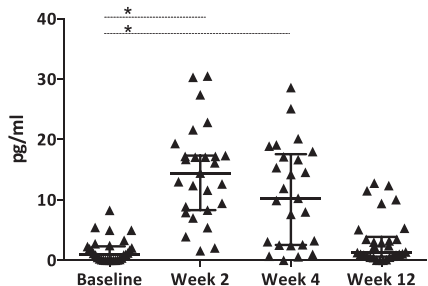**Interleukin-6 (Symptomatic)**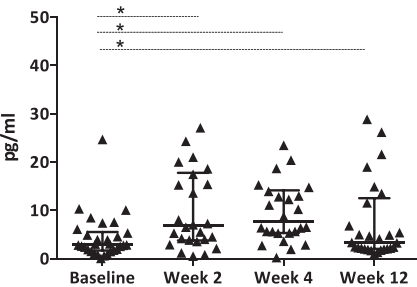**Interleukin-6 (Control)**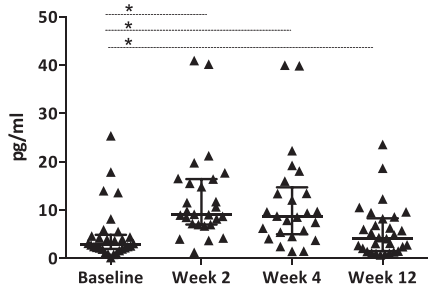**TNF $\alpha$  (Symptomatic)**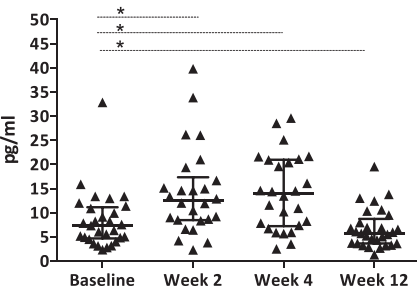**TNF $\alpha$  (Control)**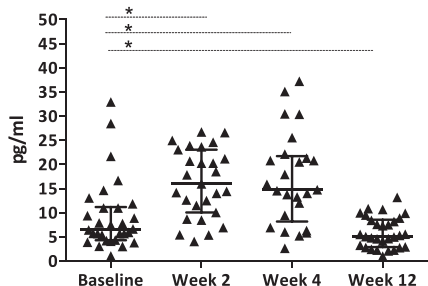

Supplement: MOESM2 [file 9446840]
